# Supplementary material for: Bifidobacterium longum S3 alleviates loperamide-induced constipation by modulating intestinal acetic acid and stearic acid levels in mice
Source: Royal Society of Chemistry journal article supplement (doi:10.1039/d4fo00695j), 2024-01-01
Supplement: d4fo00695j1.pdf [file d4fo00695j1.pdf]

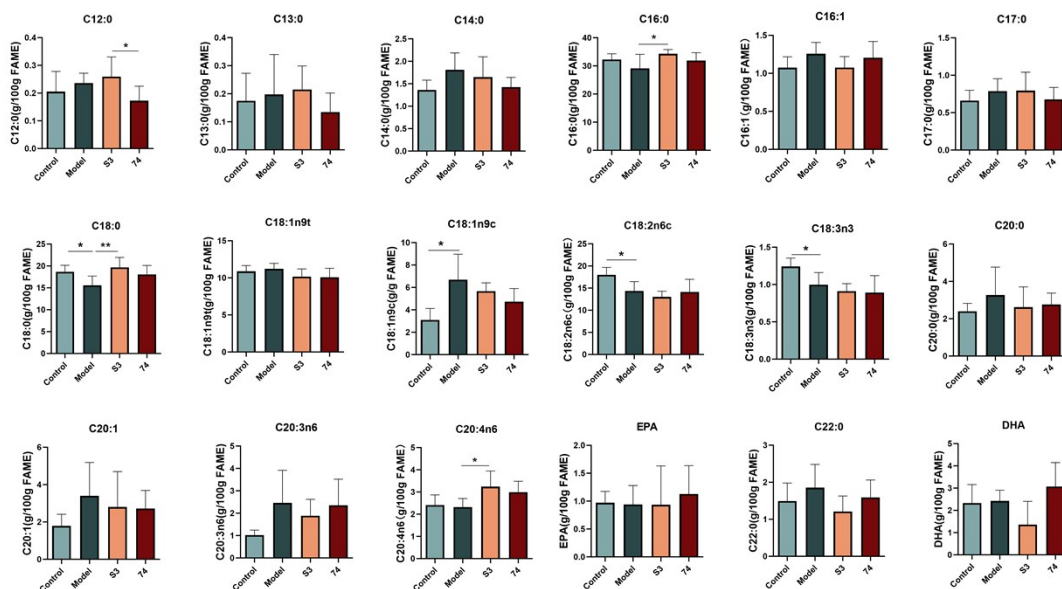

Fig.S1 Effect of *B. longum* on fecal LCFAs in constipated mice. Data are expressed as mean  $\pm$  SD.

Compared with the model group, \* $P < 0.05$  and \*\* $P < 0.01$ .
